# Supplementary material
Source: bioRxiv or medRxiv preprint supplement (https://medrxiv.org/highwire/filestream/77893/field_highwire_adjunct_files/0/2020.04.21.20073759-1.pdf)
Supplement: Supplementary file [file 2020.04.21.20073759-1.pdf]

## **Metabolic shift underlies recovery in reversible infantile respiratory chain deficiency**

Denisa Hathazi<sup>1\*</sup>, Helen Griffin<sup>2\*</sup>, Matthew J. Jennings<sup>1\*</sup>, Michele Giunta<sup>2\*</sup>, Christopher Powell<sup>3</sup>, Sarah F. Pearce<sup>3,4</sup>, Benjamin Munro<sup>1</sup>, Wei Wei<sup>1,3</sup>, Veronika Boczonadi<sup>2</sup>, Joanna Poulton<sup>5</sup>, Angela Pyle<sup>2</sup>, Claudia Calabrese<sup>1,3</sup>, Aurora Gomez-Duran<sup>1,3</sup>, Ulrike Schara<sup>6</sup>, Robert D.S. Pitceathly<sup>7</sup>, Michael G. Hanna<sup>7</sup>, Kairit Joost<sup>8</sup>, Ana Cotta<sup>9</sup>, Julia Filardi Paim<sup>9</sup>, Monica Machado Navarro<sup>10</sup>, Jennifer Duff<sup>2</sup>, Andre Mattmann<sup>11</sup>, Kristine Chapman<sup>11</sup>, Serenella Servidei<sup>12</sup>, Johanna Uusimaa<sup>13</sup>, Andreas Roos<sup>6,14</sup>, Vamsi Mootha<sup>15</sup>, Michio Hirano<sup>16</sup>, Mar Tulinius<sup>17</sup>, Manta Giri<sup>18</sup>, Eric P. Hoffmann<sup>18</sup>, Hanns Lochmüller<sup>19</sup>, Salvatore DiMauro<sup>16</sup>, Michal Minczuk<sup>3</sup>, Patrick F. Chinnery<sup>1,3</sup>, Juliane S. Müller<sup>1\*</sup>, Rita Horvath<sup>1\*</sup>

<sup>1</sup>*Department of Clinical Neurosciences, School of Clinical Medicine, University of Cambridge, Cambridge, UK;*

<sup>2</sup>*Wellcome Centre for Mitochondrial Research, Translational and Clinical Research Institute, Newcastle University, Newcastle upon Tyne, UK;*

<sup>3</sup>*MRC Mitochondrial Biology Unit, Cambridge Biomedical Campus, Cambridge, UK;*

<sup>4</sup>*Karolinska Institute, University of Stockholm, Sweden;*

<sup>5</sup>*Nuffield Department of Obstetrics & Gynaecology, University of Oxford, Oxford, UK;*

<sup>6</sup>*Pediatric Neurology, University of Essen, Essen, Germany;*

<sup>7</sup>*MRC Centre for Neuromuscular Diseases, UCL Queen Square Institute of Neurology and National Hospital for Neurology and Neurosurgery, London, UK;*

<sup>8</sup>*Centre of Allergology and Immunology, East-Tallinn Central Hospital, Tallinn, Estonia;*

<sup>9</sup>*Departments of Pathology and* <sup>10</sup>*Pediatrics, Neuromuscular Unit, SARAH Network of Rehabilitation Hospitals, Belo Horizonte, Brazil;*

<sup>11</sup>*Dept of Pathology and Laboratory Medicine SPH, St. Paul's Hospital, Vancouver, Canada;*

<sup>12</sup>*Department of Neurology, Università Cattolica del Sacro Cuore, Roma, Italy;*

<sup>13</sup>*PEDEGO Research Unit/Pediatric Neurology, Medical Research Center Oulu, Oulu University Hospital and University of Oulu, Oulu, Finland;*

<sup>14</sup>*Leibniz Institute for Analytical Sciences (ISAS), Dortmund, Germany;*

<sup>15</sup>*Howard Hughes Medical Institute and Harvard Medical School, Boston, US;*

<sup>16</sup>*Department of Neurology, Columbia University Medical Center, New York, NY, USA;*

<sup>17</sup>*Department of Pediatrics, The Sahlgrenska Academy, University of Gothenburg, Gothenburg, Sweden;*

<sup>18</sup>*School of Pharmacy and Pharmaceutical Sciences, Binghamton University, New York, US;*

<sup>19</sup>*Department of Neuropediatrics and Muscle Disorders, Medical Center – University of Freiburg, Faculty of Medicine, Freiburg, Germany;*

<sup>20</sup>*Centro Nacional de Análisis Genómico (CNAG-CRG), Center for Genomic Regulation, Barcelona Institute of Science and Technology (BIST), Barcelona, Catalonia, Spain; Children's Hospital of Eastern Ontario Research Institute, University of Ottawa, Ottawa, Canada and Division of Neurology, Department of Medicine, The Ottawa Hospital, Ottawa, Canada*

### Supplementary Figure 1.

Pedigrees of the 19 RIRCD families. The \* symbol indicates the individuals where DNA analysis was performed.

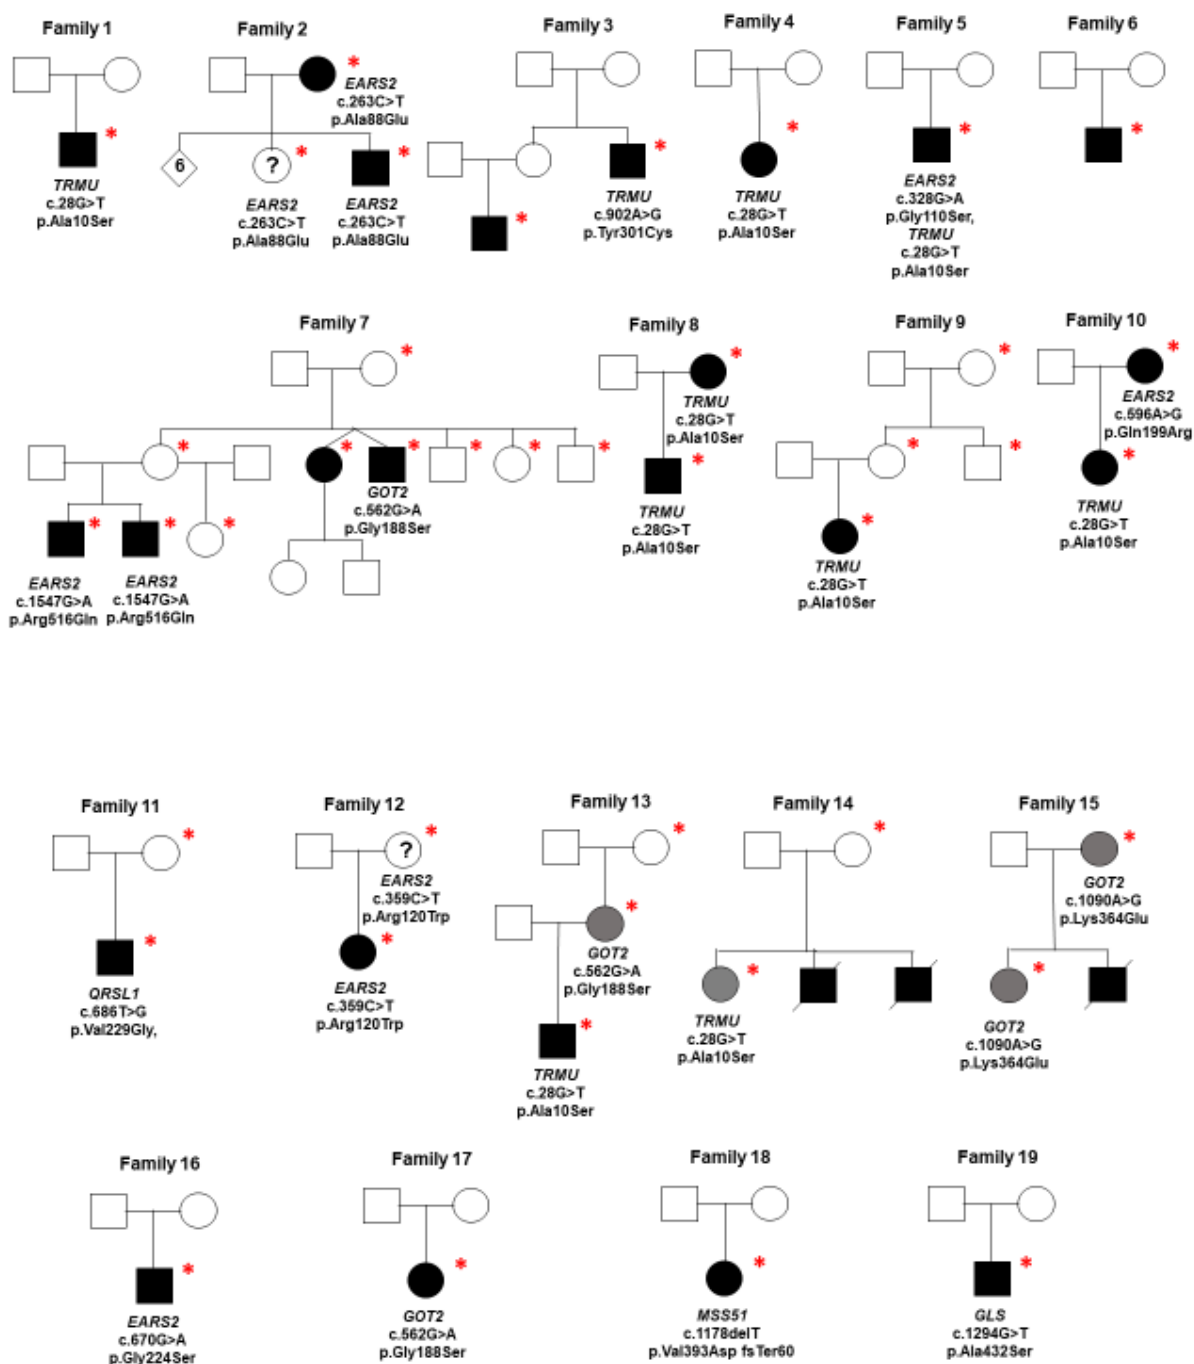

### Supplementary Figure 2.

Exome mtDNA read depth and mtDNA haplogroups in the families homoplasmic for m.14674T>C.

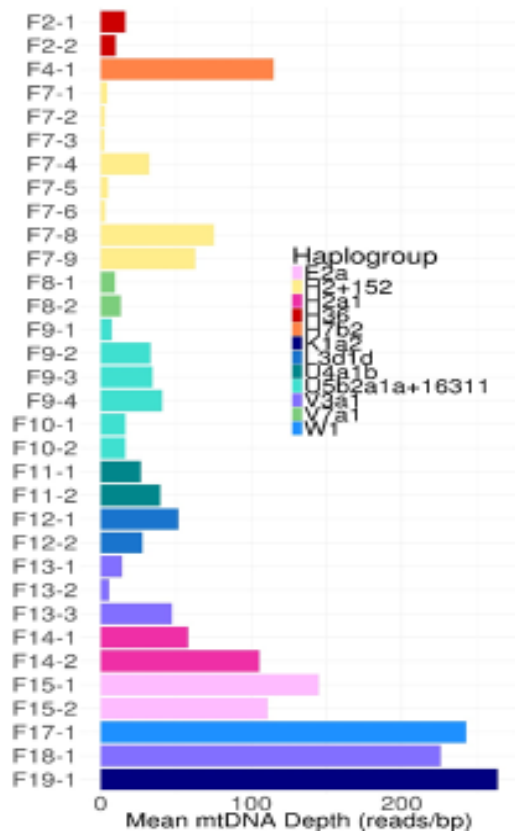

**Supplementary Figure 3.**

(A) Western of total cell lysate of HEK293T cells (+/+) and *PDE12* knock-out cells (-/-) and -/- cells expressing WT *PDE12*, p.Glu351Ala (catalytic mutant),  $\Delta 16$  (coding for *PDE12* lacking 16 first aa),  $\Delta 23$  mutants (coding for *PDE12* lacking 23 first aa), and p.Arg23Trp *PDE12* cDNA. B-actin was used as loading control. (B) Radioactive MPAT assay for 16S mt-rRNA extracted from HEK293T (+/+), *PDE12* knock-out cells (-/-), and for *PDE12*<sup>-/-</sup> cells expressing WT *PDE12*, p.Glu351Ala,  $\Delta 16$ ,  $\Delta 23$  mutants and p.Arg23Trp *PDE12* cDNA for 24 hr. Experiments and cell lines as described in (Pearce et al., 2017). (C) Immunofluorescence to confirm mitochondrial localisation of the p.Arg23Trp *PDE12* variant in human cells. TOM20, translocator of the outer mitochondrial membrane 20. Scale bar = 20  $\mu$ m.

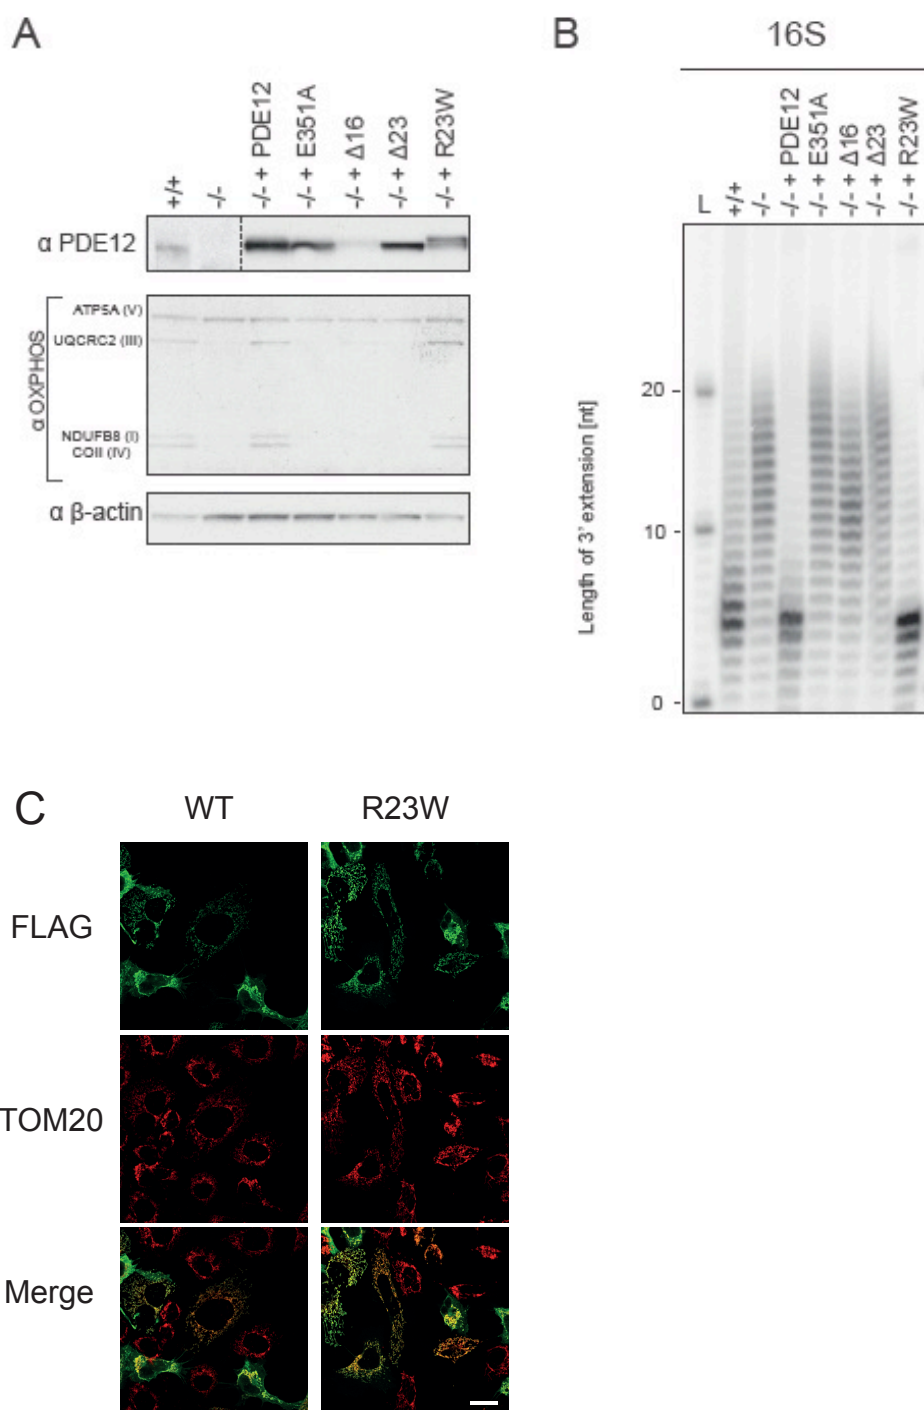

**Supplementary Figure 4.**

Scatter/boxplot shows the significant difference between mean per group damaging allele counts (RIRCD affected vs. unaffected vs. 1044x 1000 Genomes control exomes) in the genes *EARS2*, *TRMU*, *QRSL1*, *GOT2*, *GLS*, *MSS51* and m.14674T>C.

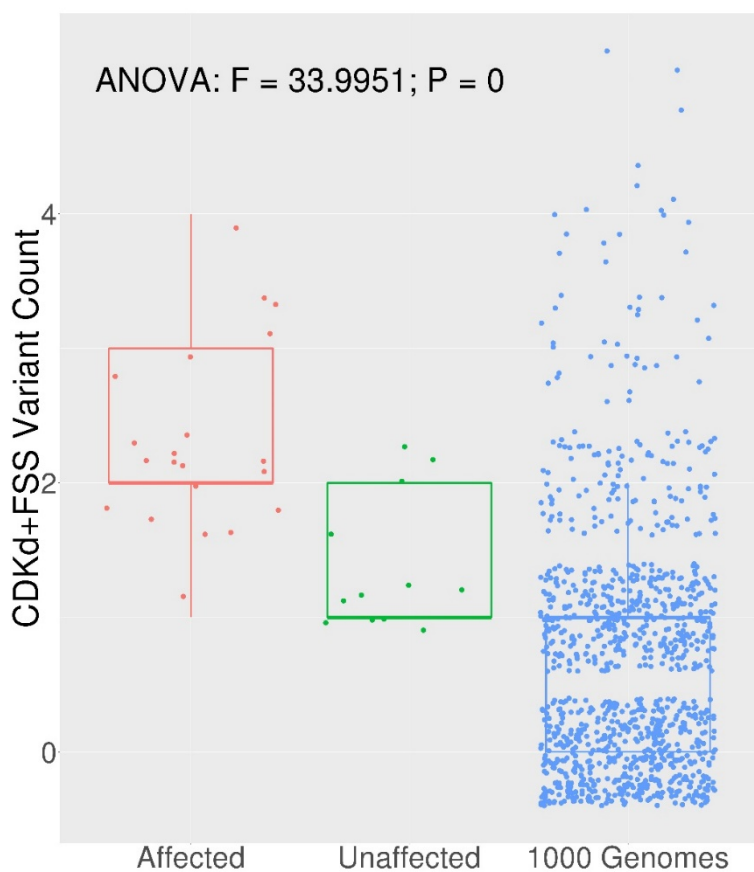

### Supplementary Figure 5.

Aminoacylation assay of mt-tRNA<sup>Glu</sup> and mt-tRNA<sup>Gln</sup> in fibroblasts carrying digenic mutations in mtDNA (m.14674T>C) and in *EARS2* (p.Arg516Gln) (F7/1M, F7/2M), carrying only m.14674T>C (F7/5F, F7/7F) and healthy controls. The cells were cultured in low (low aa) and high amino acid (aa) concentrations. There is no relevant difference in the aminoacylation of fibroblasts of patients with digenic mutations, carriers of m.14674T>C and healthy controls.

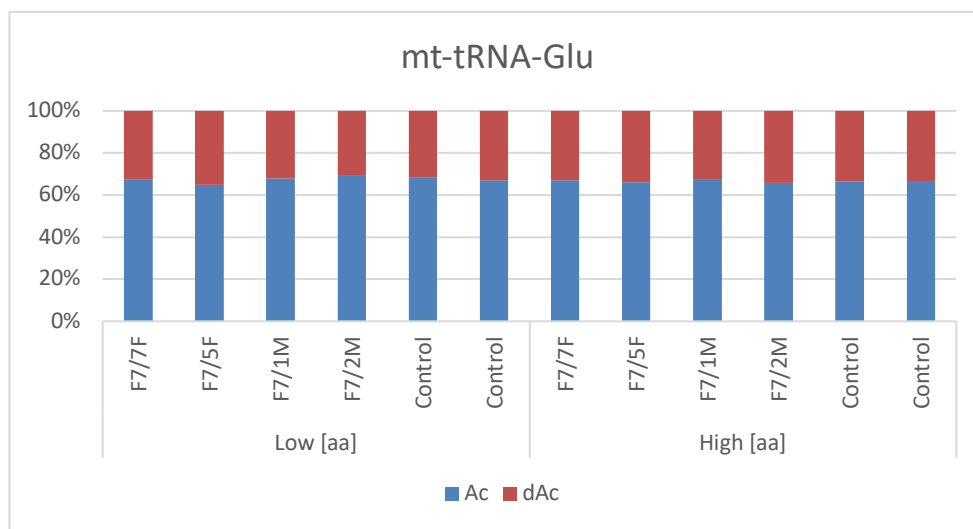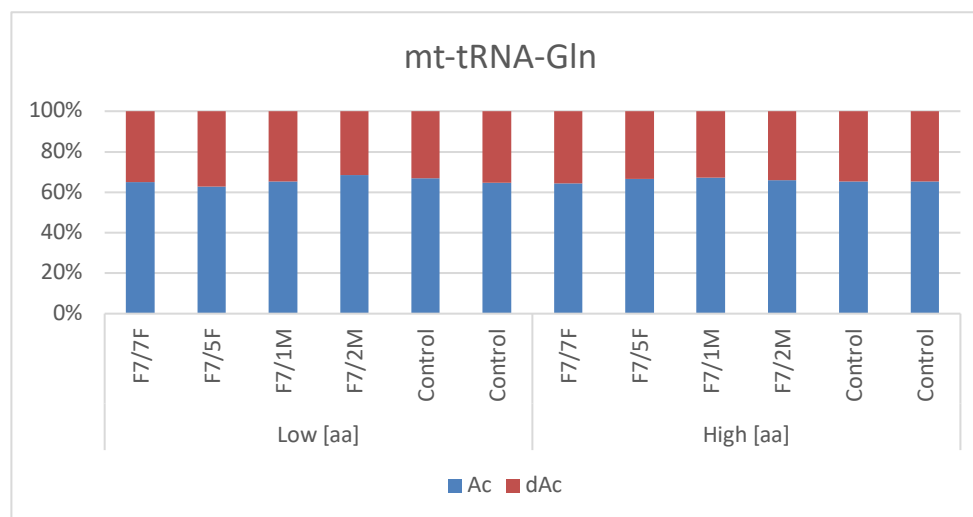



**Supplementary Table 1.** Mitochondrial haplogroups and digenic nuclear variants in affected RIRCD family members.

| Family | Haplogroup    | Relationship    | Nuclear Risk Variants |                    |          |
|--------|---------------|-----------------|-----------------------|--------------------|----------|
|        |               |                 | Gene                  | Protein            | Genotype |
| F1     | n. d.         | Proband         | <i>TRMU</i>           | p.Ala10Ser         | 0/1      |
| F2     | H36           | Proband         | <i>EARS2</i>          | p.A88Glu           | 0/1      |
|        |               | Mother of F2/1  | <i>EARS2</i>          | p.Ala88Glu         | 0/1      |
| F3     | n. d.         | Uncle of F3/2   | <i>TRMU</i>           | p.Tyr301Cy         | 0/1      |
| F4     | H7b2          | Proband         | <i>TRMU</i>           | p.Ala10Ser         | 0/1      |
| F5     | V7a1          | Proband         | <i>EARS2</i>          | p.Gly110Ser*       | 0/1      |
|        |               |                 | <i>TRMU</i>           | p.Ala10Ser         | 0/1      |
| F7     | H+152         | Sibling of F7/2 | <i>EARS2</i>          | p.Arg516Gln*       | 0/1      |
|        |               | Sibling of F7/1 | <i>EARS2</i>          | p.Arg516Gln*       | 0/1      |
|        |               | Uncle of F7/1-2 | <i>GOT2</i>           | p.Gly188Ser        | 0/1      |
| F8     | U5b2a1a+16311 | Proband         | <i>TRMU</i>           | p.Ala10Ser         | 0/1      |
| F9     | U5b2a1a+16311 | Proband         | <i>TRMU</i>           | p.Ala10Ser         | 0/1      |
| F10    | U5b2a1a+16311 | Proband         | <i>TRMU</i>           | p.Ala10Ser         | 0/1      |
|        |               | Mother of F8/1  | <i>EARS2</i>          | p.Gln199Arg        | 0/1      |
| F11    | U4a1b         | Proband         | <i>QRSL1</i>          | p.Val229Gly        | 0/1      |
| F12    | L3d1d         | Proband         | <i>EARS2</i>          | p.Arg120Trp        | 0/1      |
| F13    | V3a1          | Proband         | <i>TRMU</i>           | p.Ala10Ser         | 0/1      |
|        |               | Mother of F13/1 | <i>GOT2</i>           | p.Gly188Ser        | 0/1      |
| F14    | H2a1          | Sister of F14/1 | <i>TRMU</i>           | p.Ala10Ser         | 0/1      |
| F15    | E2a           | Sister of F15/1 | <i>GOT2</i>           | p.Lys364Glu        | 0/1      |
|        |               | Mother of F15/1 | <i>GOT2</i>           | p.Lys364Glu        | 0/1      |
| F17    | W1            | Proband         | <i>GOT2</i>           | p.Gly188Ser        | 0/1      |
| F18    | V3a1          | Proband         | <i>MSS51</i>          | p.Val393AspfsTer60 | 0/1      |
| F19    | K1a2          | Proband         | <i>GLS</i>            | p.Ala432Ser        | 0/1      |

\*known pathogenic, autosomal recessive mutation

**Supplementary Table 2.** Number of exome variants at each stage of filtering in total and for affected and unaffected individuals in RIRCD families with homoplasmic m.14674T>C.

| Type of Variant                                                                  | Total Number of Variants | Affected Only* (n=18) | Unaffected Only* (n=12) |
|----------------------------------------------------------------------------------|--------------------------|-----------------------|-------------------------|
| Total Variants                                                                   | 4,907,159                | 1,847,621             | 1,106,024               |
| Total Protein Altering                                                           | 42,473                   | 14,885                | 5,725                   |
| Conserved (2+)                                                                   | 15,775                   | 6,051                 | 2,344                   |
| Predicted Damaging (5+)                                                          | 13,816                   | 5,458                 | 2,163                   |
| Conserved (2+), Damaging (5+)                                                    | 10,991                   | 4,340                 | 1,705                   |
| Conserved (2+), Damaging (5+), Known Domain                                      | 5,013                    | 2,022                 | 779                     |
| <b>Conserved, Damaging, Known Domain OR Splicing, Stop-Loss/Gain, Frameshift</b> | <b>6,998</b>             | <b>2,698</b>          | <b>1,067</b>            |

**Supplementary Table 3.** Details of digenic nuclear variants in affected RIRCD

patients homoplasmic for m.14674T&gt;C.

| Gene         | Variant                | Patient/<br>Family | ExAC                  | gnomAD                | ExAC<br>homozy-<br>gous | CADD<br>Score       | Protein<br>function                                                        |
|--------------|------------------------|--------------------|-----------------------|-----------------------|-------------------------|---------------------|----------------------------------------------------------------------------|
| <i>EARS2</i> | p.Arg120Trp            | 2/1                | 6.57x10 <sup>-5</sup> | 2.79x10 <sup>-5</sup> | 0                       | 29.4                | tRNA synthetase<br>of mt-tRNA <sup>Glu</sup>                               |
|              | p.Gln199Arg            | 1/1                | 1.66x10 <sup>-5</sup> | 1.4x10 <sup>-5</sup>  | 0                       | 8.1                 |                                                                            |
|              | p.Ala88Glu             | 2/1                | 1.66x10 <sup>-3</sup> | 1.15x10 <sup>-3</sup> | 0                       | 23.6                |                                                                            |
|              | p.Gly110Ser*           | 1/1                | 3.66x10 <sup>-4</sup> | 2.09x10 <sup>-4</sup> | 0                       | 34                  |                                                                            |
|              | p.Gly224Ser*           | 1/1                | 1.20x10 <sup>-3</sup> | 3.38x10 <sup>-3</sup> | 4                       | 28.3                |                                                                            |
|              | p.Arg516Gln*           | 2/1                | 3.31x10 <sup>-5</sup> | 9.07x10 <sup>-5</sup> | 0                       | 34                  |                                                                            |
| <i>TRMU</i>  | p.Ala10Ser             | 9/8                | 0.197                 | 9.69x10 <sup>-2</sup> | 303                     | 29.6                | thiomodification<br>of mt-tRNA <sup>Glu</sup>                              |
|              | p.Tyr301Cys            | 1/1                | 6.7x10 <sup>-4</sup>  | 4.17x10 <sup>-4</sup> | 0                       | 25.5                |                                                                            |
| <i>GOT2</i>  | p.Gly188Ser            | 3/3                | 0.064                 | 6.04x10 <sup>-2</sup> | 309                     | 24.6                | mitochondrial<br>glutamate-<br>oxaloacetate<br>transaminase                |
|              | p.Lys364Glu            | 2/2                | 7.25x10 <sup>-4</sup> | 7.42x10 <sup>-4</sup> | 0                       | 21.9                |                                                                            |
| <i>MSS51</i> | p.Val393Aspfs<br>Ter60 | 1/1                | 0.002                 | 1.51x10 <sup>-3</sup> | 0                       | -<br>frame<br>shift | muscle specific<br><i>MTCO1</i><br>translational<br>activator              |
| <i>QRSL1</i> | p.Val229Gly            | 1/1                | 0.001                 | 1.29x10 <sup>-3</sup> | 0                       | 25.8                | tRNA synthetase<br>of mt-tRNA <sup>Glu</sup><br>and mt-tRNA <sup>Gln</sup> |
| <i>GLS</i>   | p.Ala432Ser            | 1/1                | 0.001                 | 1.67x10 <sup>-3</sup> | 1                       | 25.9                | glutaminase:<br>converts<br>glutamine to<br>glutamate                      |

**Supplementary data**

Differentially expressed genes and proteins in muscle biopsies of RIRCD patients (uploaded separately).
